# Supplementary material for: Genome-Wide Association Study Reveals Novel Genomic Regions for Grain Yield and Yield-Related Traits in Drought-Stressed Synthetic Hexaploid Wheat
Source: MDPI journal article supplement (doi:10.3390/ijms19103011), 2018-10-02
Supplement: s1 [file s1]

**Table S4.** Combined analysis of variance with means squares and broad sense heritability ( $H^2$ ) of 123 drought stressed synthetic hexaploid wheat grown in two seasons (2016 and 2017) in Konya, Turkey.

| Source         | DF  | Grain yield | Harvest index | Biomass weight | Thousand kernel weight | Grain volume weight | Awn length | Flag leaf length | Flag leaf width | Flag leaf area | Stem diameter | Root length |
|----------------|-----|-------------|---------------|----------------|------------------------|---------------------|------------|------------------|-----------------|----------------|---------------|-------------|
| Year (YR)      | 1   | 9982        | 0.0073        | 229461         | 411***                 | 84.3***             | 0.3        | 399***           | 0.0005          | 264***         | 0.04          | 263427***   |
| Replication(R) | 1   | 94696***    | 0.0101*       | 467260**       | 1                      | 0                   | 1.5        | 5                | 0.1486**        | 33**           | 0.06          | 7914        |
| iblock(R*YR)   | 54  | 5181**      | 0.0018*       | 43534***       | 3                      | 2.2                 | 0.5        | 2                | 0.0147          | 4              | 0.11          | 3177        |
| Check          | 1   | 100         | 0.0001        | 2190           | 12                     | 4.4                 | 2.9*       | 1                | 0.3397***       | 52**           | 0.33          | 15824       |
| Genotype(G)    | 122 | 5967*       | 0.0038*       | 27184*         | 27***                  | 18.6**              | 5.8***     | 8*               | 0.0276***       | 14*            | 0.2***        | 9790*       |
| G X YR         | 123 | 4376*       | 0.0027***     | 20126*         | 8***                   | 10.9***             | 1.4***     | 7.7**            | 0.0152          | 12**           | 0.11          | 8510*       |
| Residual       | 87  | 2869        | 0.0011        | 13372          | 4                      | 2.6                 | 0.6        | 4                | 0.0161          | 6              | 0.08          | 6072        |
| $H^2$          |     | 0.40        | 0.62          | 0.56           | 0.74                   | 0.75                | 0.81       | 0.49             | 0.56            | 0.50           | 0.62          | 0.27        |

\*, \*\*, and \*\*\* Significant at the 0.05, 0.01, and 0.001 probability level, respectively.
