# Supplementary material for: Genome-Wide Association Study Reveals Novel Genomic Regions for Grain Yield and Yield-Related Traits in Drought-Stressed Synthetic Hexaploid Wheat
Source: MDPI journal article supplement (doi:10.3390/ijms19103011), 2018-10-02
Supplement: s1 [file s1]

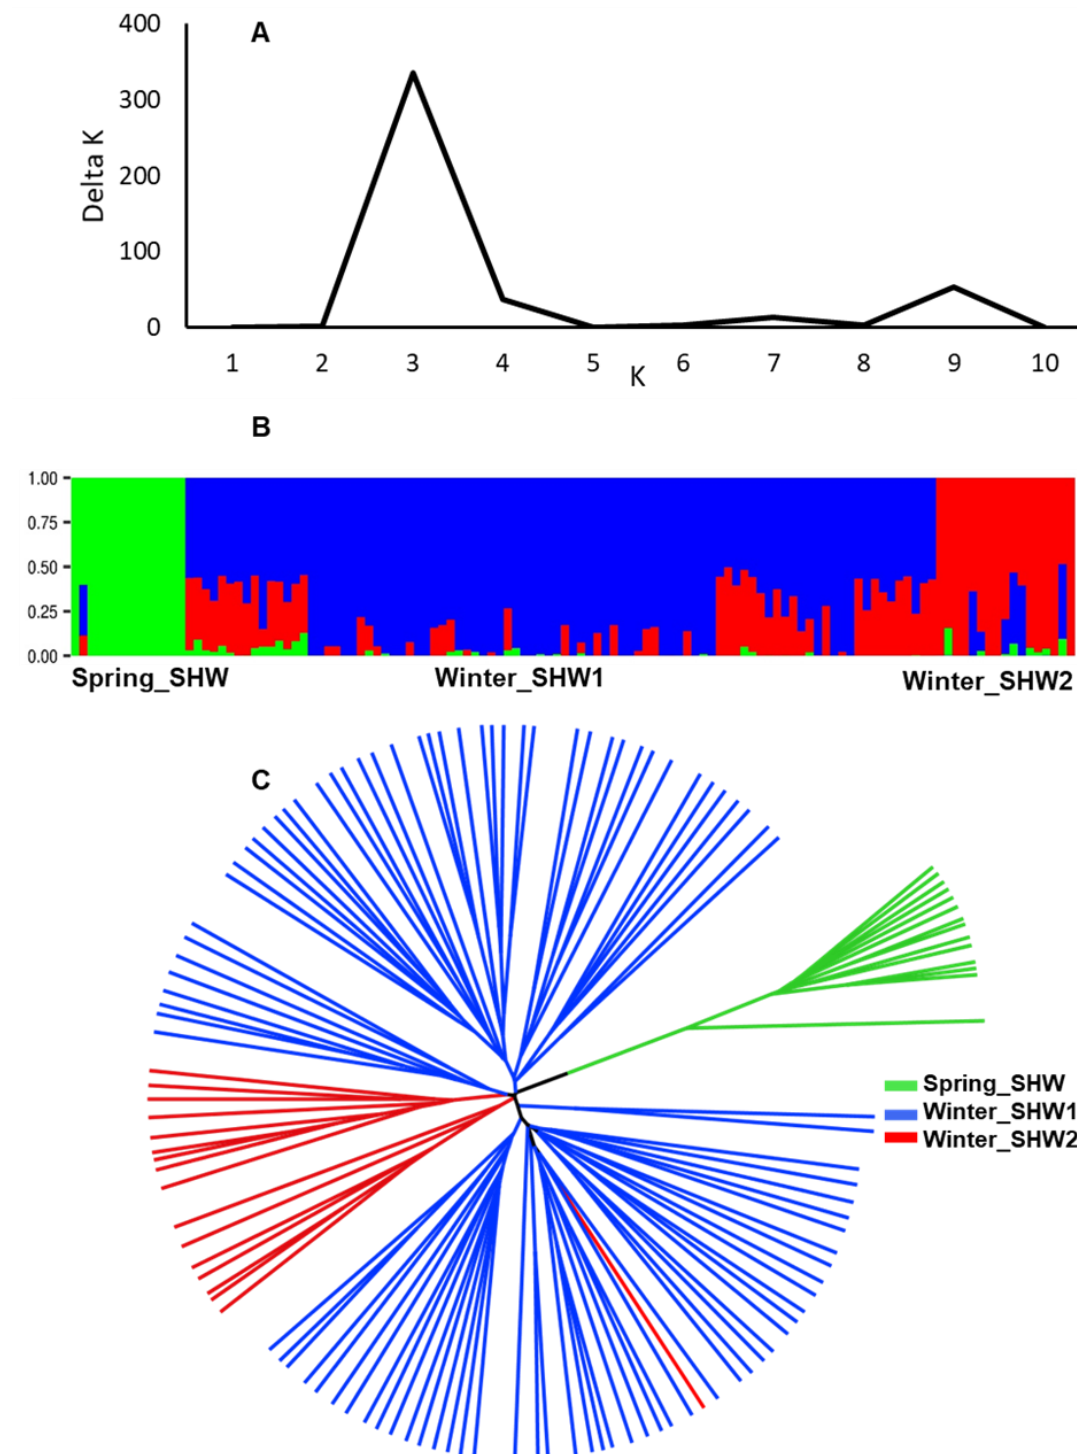

**Figure S2.** Population structure analysis of 123 synthetic hexaploid wheat. (A) Line graph of  $\Delta K$  over  $K$  from 1 to 10, and the highest peak was observed  $\Delta K=3$ , suggesting SHW has three subgroups. (B) Three subgroups (Spring\_SHW, Winter\_SHW1, and Winter\_SHW2) were identified from the STRUCTURE. (C) UPGMA cluster analysis.
