# Supplementary material for: Genome-Wide Association Study Reveals Novel Genomic Regions for Grain Yield and Yield-Related Traits in Drought-Stressed Synthetic Hexaploid Wheat
Source: MDPI journal article supplement (doi:10.3390/ijms19103011), 2018-10-02
Supplement: s1 [file s1]

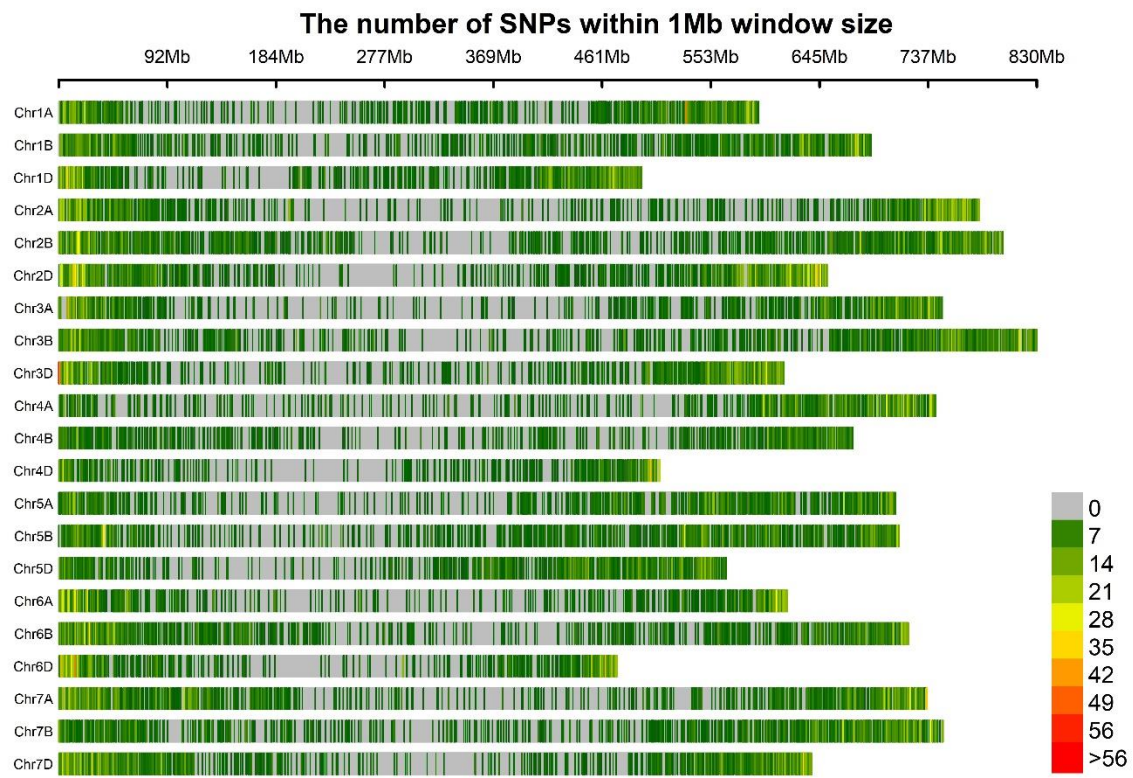

**Figure S3.** Physical distribution of genotyping-by-sequencing-derived SNPs within a 1 Mb window size on 21 chromosomes of 123 synthetic hexaploid wheat.
